# Supplementary material for: Attacks on healthcare facilities as an indicator of violence against civilians in Syria: An exploratory analysis of open-source data
Source: PubMed Central journal article supplement (PMC6557482; doi:10.1371/journal.pone.0217905), 2019-06-10
Supplement: pone.0217905.s002.pdf [file pone.0217905.s002.pdf]

**S2 Table: Timeline of Significant Events in the Syrian Civil War from March 2011 to November 2017 (See Fig 1)**

Category of Violence Legend

-  CF: Ceasefires/De-Escalation Zones/Safe-Zones
-  MP: Mass Protests
-  CW: Chemical Weapons
-  NP: National Politics
-  II: International Intervention
-  NW: New Weaponry Used

| Date      | Months since Mar. 2011 | Date                         | Event                                                                                                                                                                                                                              | Category of Violence* |
|-----------|------------------------|------------------------------|------------------------------------------------------------------------------------------------------------------------------------------------------------------------------------------------------------------------------------|-----------------------|
| Mar. 2011 | 0                      | Mar. 15                      | “Day of Rage” as hundred stage protests in Syria for arrests of several youth in Daraa for writing graffiti to call for the downfall of the regime                                                                                 | MP                    |
| Apr. 2011 | 1                      | Apr. 29                      | United States imposes sanctions on top Syrian officials                                                                                                                                                                            | II                    |
| May 2011  | 2                      | May 10                       | EU imposes sanctions on 13 of Syria’s top officials                                                                                                                                                                                | II                    |
| Jun. 2011 | 3                      | Jun. 17                      | Tens of thousands protest in Daraa, Deir al-Zor, Homs, Kiswa and Hama leading to arrest of 2,000 civilians and 130 civilians deaths                                                                                                | MP                    |
| Jul. 2011 | 4                      | Jul. 3                       | Assad deploys troops to areas of massive protests and open fire and conduct mass arrest                                                                                                                                            | MP                    |
| Jan. 2012 | 10                     | Jan. 13                      | Weekly Friday protests occurred, with tens of thousands protesting in Homs, Hama, Idlib, Aleppo and Damascus.                                                                                                                      | MP                    |
| Feb. 2012 | 11                     | Feb. 10<br>Feb. 27           | Mass protests spread across Syria in Aleppo, Hama, Idlib, Daraa and Damascus<br>European Union announces sanctions against Syria                                                                                                   | MP<br>II              |
| Mar. 2012 | 12                     | Mar. 23                      | Fighting between the FSA and Syrian army and weekly Friday protests continue in Damascus, Daraa, Qamishli, Hasakah, the Idlib province, Aleppo, Homs, and the Hama province                                                        | MP                    |
| Apr. 2012 | 13                     | Apr. 12                      | Kofi Annan sponsored ceasefire goes into effect                                                                                                                                                                                    | CF                    |
| May 2012  | 14                     | May 7                        | Parliamentary elections took place but boycotted by opposition forces. Vast majority of the seats given to Assad and his allies.                                                                                                   | NP                    |
| Jul. 2012 | 16                     | Jul. 23<br>Jul. 24           | EU strengthened arms embargo against Syria and toughened sanctions<br>Syrian armed forces battling insurgents start using fighter jets in Damascus                                                                                 | II<br>NW              |
| Aug. 2012 | 17                     | Aug. 2<br>Aug. 10<br>Aug. 22 | Kofi Annan resigns from the UN<br>Upsurge in violence sends thousands of Syrians fleeing to neighboring countries. 146,000 Syrians have registered as refugees since March 2011<br>Gunfire and shelling rocked Damascus and Aleppo | II<br>NW              |

|           |    |                               |                                                                                                                                                                                          |          |
|-----------|----|-------------------------------|------------------------------------------------------------------------------------------------------------------------------------------------------------------------------------------|----------|
| Oct. 2012 | 19 | Oct. 14                       | Government forces accused of using Russian-made cluster bombs in Syria                                                                                                                   | NW       |
| Dec. 2012 | 21 | Dec. 23                       | First allegation of chemical weapons being reported in Homs                                                                                                                              | CW       |
| Mar. 2013 | 24 | Mar. 19<br>Mar. 24            | A gas attack kills 26 people in Khan al-assal<br>Syrian opposition activists report Syrian forces use chemical weapons in Damascus: phosphorus bombs                                     | CW       |
| Apr. 2013 | 25 | ----                          | Syrian Observatory for Human Rights (SOHR) said two gas bombs dropped in Aleppo. A helicopter dropped canisters of chemical weapons in Sarqeb township.                                  | CW       |
| Aug. 2013 | 29 | Aug. 21                       | A sarin gas attack kills hundreds in Damascus                                                                                                                                            | CW       |
| Sep. 2013 | 30 | Sep. 10                       | Syria signs the Chemical Weapons Convention (CWC)                                                                                                                                        | II       |
| Oct. 2013 | 31 | ----                          | Syria destroys its chemical weapons production<br>Refugees registered with UNHCR tops 2 million                                                                                          | NP       |
| Jun. 2014 | 39 | Jun. 3<br>Jun. 23             | Asaad wins presidential election with 88.7% of the vote for a third seven-year term as President<br>OPCW has announced the destruction and removal of all Syria chemical weapon material | NP       |
| Sep. 2014 | 42 | Sep. 22                       | US leads an anti-ISIL coalition through air and missile strikes                                                                                                                          | II       |
| Feb. 2015 | 47 | Feb. 22                       | United Nations Security Council adopts Resolution 2139 demanding all parties stop indiscriminate attacks in populated areas                                                              | II       |
| Mar. 2015 | 48 | Mar. 6                        | United Nations Security Council adopts Resolution 2209 condemning use of chlorine as weapon in Syria's civil war                                                                         | II       |
| Aug. 2015 | 53 | Aug. 7                        | United Nations Security Council new investigation to reports that chlorine gas has been used: OPCW-UN Joint Investigative Mechanisms                                                     | II       |
| Sep. 2015 | 54 | Sep. 24                       | Zabadini Ceasefire Agreement between Free Syrian Army and Syrian Armed Forces                                                                                                            | CF       |
| Feb. 2016 | 59 | Feb. 27<br>to early<br>Jul.   | Cessation of Hostilities I by United States and Russia                                                                                                                                   | CF       |
| Sep. 2016 | 66 | Sep. 7<br>Sep. 9 –<br>Sep. 19 | Allegations Toxic Chemical were used in Aleppo<br>Cessation of Hostilities II by US and Russia                                                                                           | CW<br>CF |
| Dec. 2016 | 69 | Dec. 20<br>– Jan. 2           | Syrian Armed Forces and Free Syrian Army achieve ceasefire at Wadi Barada                                                                                                                | CF       |
| Apr. 2017 | 73 | Apr. 4                        | Chemical weapons were used in Syria's Idlib province                                                                                                                                     | CW       |
| May 2017  | 74 | ----                          | Russian Syrian Safe Zones plan comes into effect                                                                                                                                         | CF       |

|              |    |        |                                                    |    |
|--------------|----|--------|----------------------------------------------------|----|
| Jul.<br>2017 | 76 | Jul. 7 | Trump and Putin agree to a limited cease fire      | CF |
| Aug.<br>2017 | 77 | Aug. 3 | Hama De-escalation Agreement                       | CF |
| Sep.<br>2017 | 78 | ----   | De-escalation Zones agreed by Iran, Turkey, Russia | CF |
